# Supplementary material
Source: PubMed Central journal article supplement (PMC7061742)
Supplement: ajcr0010-0572-f4.pdf [file ajcr0010-0572-f4.pdf]

## PDXs mucinous ovarian cancer models

**Supplementary Table 1.** Characteristics of patients #164 and #182 from which PDXs derived from

| Xeno ID | Age | Stage | Hystotype          | Grade | Residual tumor | Chemotheapy  | Schedule  | No of cycles | PFS |
|---------|-----|-------|--------------------|-------|----------------|--------------|-----------|--------------|-----|
| 164     | 56  | IV    | Mucinous carcinoma | 2     | na             | neo-adjuvant | CBDCA/Tax | 6            | 5   |
| 182     | 44  | IC    | Mucinous carcinoma | 1     | NED            | -            | -         | -            | 42  |

NED non evidence of disease. na not available.

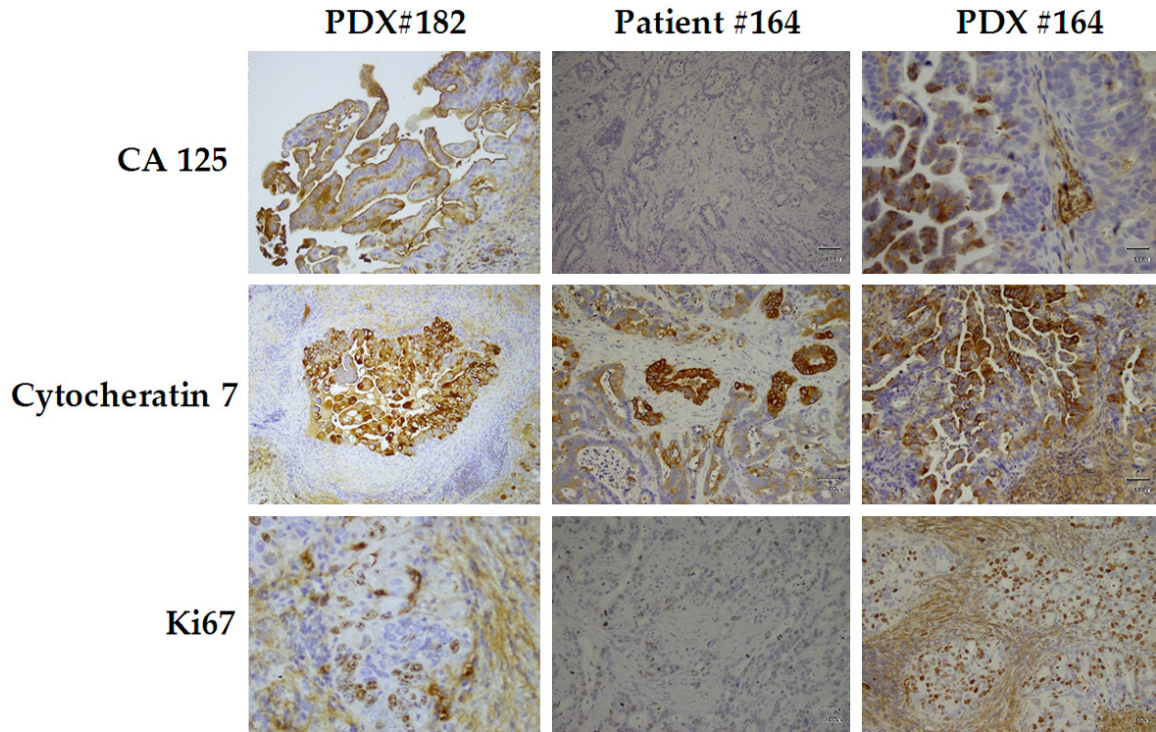

**Supplementary Figure 1.** Immunohistochemical analysis on PDX and patient's #164, and on PDX's #182.

PDXs mucinous ovarian cancer models

**Supplementary Table 2.** CGH analysis. The table reports the alteration observed in #164 and #182, both in patients and PDXs samples

| ID           | chrom | loc.start | loc.end   | type | seg.mean    | ID      | chrom | loc.start | loc.end   | type | seg.mean    |
|--------------|-------|-----------|-----------|------|-------------|---------|-------|-----------|-----------|------|-------------|
|              |       |           |           |      |             | PDX#164 | 1     | 47226827  | 71195538  | LOSS | -0.23383612 |
|              |       |           |           |      |             | PDX#164 | 1     | 90373067  | 103454621 | LOSS | -0.200775   |
|              |       |           |           |      |             | PDX#164 | 1     | 220627747 | 222012950 | LOSS | -0.1729463  |
| patient #164 | 2     | 51951101  | 58264394  | LOSS | -0.13212025 | PDX#164 | 2     | 51751984  | 58192905  | LOSS | -0.2538235  |
| patient #164 | 2     | 88591175  | 98329197  | LOSS | -0.14849373 | PDX#164 | 2     | 88355735  | 90247720  | LOSS | -0.50372969 |
|              |       |           |           |      |             | PDX#164 | 2     | 91812834  | 98303915  | LOSS | -0.17649264 |
|              |       |           |           |      |             | PDX#164 | 2     | 115872796 | 116841792 | LOSS | -0.49634463 |
|              |       |           |           |      |             | PDX#164 | 2     | 159512538 | 162169631 | LOSS | -0.30143563 |
|              |       |           |           |      |             | PDX#164 | 3     | 24186625  | 93737580  | LOSS | -0.20101206 |
| patient #164 | 4     | 90421700  | 187866343 | LOSS | -0.11807837 | PDX#164 | 4     | 20714719  | 22435993  | LOSS | -0.37643872 |
|              |       |           |           |      |             | PDX#164 | 4     | 34595824  | 40598634  | LOSS | -0.21799649 |
|              |       |           |           |      |             | PDX#164 | 4     | 90958046  | 187866343 | LOSS | -0.23232617 |
| patient #164 | 5     | 43704556  | 152621660 | LOSS | -0.12453422 | PDX#164 | 5     | 28286502  | 28601552  | LOSS | -0.5111838  |
|              |       |           |           |      |             | PDX#164 | 5     | 49952847  | 135758057 | LOSS | -0.23260105 |
|              |       |           |           |      |             | PDX#164 | 5     | 135764923 | 136003152 | HDEL | -2.87880778 |
|              |       |           |           |      |             | PDX#164 | 5     | 140588373 | 153616916 | LOSS | -0.26152751 |
| patient #164 | 6     | 58738122  | 61929807  | HDEL | -0.83391937 | PDX#164 | 6     | 1374277   | 28521316  | LOSS | -0.20510848 |
|              |       |           |           |      |             | PDX#164 | 6     | 70137886  | 85181754  | LOSS | -0.21755622 |
|              |       |           |           |      |             | PDX#164 | 6     | 85205713  | 85518398  | HDEL | -2.47892978 |
|              |       |           |           |      |             | PDX#164 | 6     | 85521035  | 101562017 | LOSS | -0.23053892 |
|              |       |           |           |      |             | PDX#164 | 6     | 101568294 | 102417713 | HDEL | -2.16270399 |
|              |       |           |           |      |             | PDX#164 | 6     | 102423940 | 110447643 | LOSS | -0.23646079 |
|              |       |           |           |      |             | PDX#164 | 6     | 110532805 | 118091629 | GAIN | 0.120967829 |
|              |       |           |           |      |             | PDX#164 | 6     | 118103840 | 123172683 | LOSS | -0.21727506 |
|              |       |           |           |      |             | PDX#164 | 6     | 123183020 | 170898549 | GAIN | 0.101023285 |
| patient #164 | 7     | 55848790  | 66689729  | LOSS | -0.13485114 | PDX#164 | 7     | 34777714  | 37958289  | LOSS | -0.25117862 |
| patient #164 | 7     | 102828569 | 104289858 | LOSS | -0.18103569 | PDX#164 | 7     | 40054784  | 42283788  | LOSS | -0.30869191 |
| patient #164 | 8     | 70761794  | 72742860  | LOSS | -0.16135322 | PDX#164 | 8     | 176818    | 43646413  | LOSS | -0.17136785 |
| patient #164 | 8     | 144626533 | 144899538 | LOSS | -0.35671155 | PDX#164 | 8     | 70222636  | 72871111  | LOSS | -0.20269474 |
|              |       |           |           |      |             | PDX#164 | 8     | 72872544  | 77560474  | GAIN | 0.125503941 |
|              |       |           |           |      |             | PDX#164 | 8     | 77575477  | 79654145  | LOSS | -0.23937531 |
|              |       |           |           |      |             | PDX#164 | 8     | 79686236  | 80214806  | HDEL | -1.80037814 |
| patient #164 | 9     | 20793269  | 29112301  | LOSS | -0.22625262 | PDX#164 | 9     | 17444478  | 21150650  | LOSS | -0.15240683 |
|              |       |           |           |      |             | PDX#164 | 9     | 21157373  | 23092415  | HDEL | -2.60981006 |

PDXs mucinous ovarian cancer models

|              |    |           |           |      |             |         |    |           |           |      |             |
|--------------|----|-----------|-----------|------|-------------|---------|----|-----------|-----------|------|-------------|
|              |    |           |           |      |             | PDX#164 | 9  | 23121911  | 29052442  | LOSS | -0.27108901 |
| patient #164 | 10 | 135708    | 135430043 | LOSS | -0.11131817 | PDX#164 | 10 | 135708    | 23708636  | LOSS | -0.22796377 |
|              |    |           |           |      |             | PDX#164 | 10 | 23755800  | 25705149  | HDEL | -2.09178179 |
|              |    |           |           |      |             | PDX#164 | 10 | 25740053  | 56018508  | LOSS | -0.22554604 |
|              |    |           |           |      |             | PDX#164 | 10 | 56076004  | 57628056  | HDEL | -2.5021768  |
|              |    |           |           |      |             | PDX#164 | 10 | 57667668  | 64602767  | LOSS | -0.32362268 |
|              |    |           |           |      |             | PDX#164 | 10 | 64615451  | 66612353  | LOSS | -0.31556414 |
|              |    |           |           |      |             | PDX#164 | 10 | 66702282  | 68680367  | HDEL | -1.90789248 |
|              |    |           |           |      |             | PDX#164 | 10 | 68687179  | 109115199 | LOSS | -0.22824603 |
|              |    |           |           |      |             | PDX#164 | 10 | 109173829 | 110688807 | HDEL | -1.88233379 |
|              |    |           |           |      |             | PDX#164 | 10 | 110697497 | 135430043 | LOSS | -0.20661974 |
| patient #164 | 11 | 21632174  | 26521821  | LOSS | -0.13287578 | PDX#164 | 11 | 21894814  | 23783338  | LOSS | -0.26411404 |
| patient #164 | 11 | 48647107  | 50467850  | LOSS | -0.20076055 | PDX#164 | 11 | 47983477  | 67408791  | LOSS | -0.19684138 |
| patient #164 | 11 | 50474459  | 51366191  | LOSS | -0.56786599 | PDX#164 | 11 | 67414492  | 74360030  | GAIN | 0.105256015 |
| patient #164 | 11 | 51372036  | 64147083  | LOSS | -0.11666955 | PDX#164 | 11 | 74366331  | 124190137 | LOSS | -0.10683956 |
| patient #164 | 11 | 77069746  | 124227543 | LOSS | -0.10617829 | PDX#164 | 11 | 124227543 | 134944006 | GAIN | 0.139078978 |
| patient #164 | 12 | 7520771   | 9813414   | LOSS | -0.31594017 | PDX#164 | 12 | 6128984   | 8023943   | LOSS | -0.23968702 |
|              |    |           |           |      |             | PDX#164 | 12 | 8029351   | 8274082   | HDEL | -2.31281488 |
|              |    |           |           |      |             | PDX#164 | 12 | 8280908   | 8509503   | HDEL | -0.65846985 |
|              |    |           |           |      |             | PDX#164 | 12 | 8609795   | 9428169   | HDEL | -2.41970498 |
|              |    |           |           |      |             | PDX#164 | 12 | 9451761   | 9816429   | LOSS | -0.32804057 |
|              |    |           |           |      |             | PDX#164 | 12 | 41723032  | 42942234  | LOSS | -0.22340097 |
|              |    |           |           |      |             | PDX#164 | 12 | 46670589  | 49512017  | LOSS | -0.20045613 |
|              |    |           |           |      |             | PDX#164 | 12 | 74690292  | 78768977  | LOSS | -0.18942913 |
| patient #164 | 13 | 66357912  | 115106996 | GAIN | 0.107197262 | PDX#164 | 13 | 57464113  | 66324372  | LOSS | -0.21301909 |
| patient #164 | 14 | 106681665 | 107023065 | AMPL | 1.127471562 | PDX#164 | 14 | 50563262  | 51195365  | LOSS | -0.36233976 |
|              |    |           |           |      |             | PDX#164 | 14 | 106681665 | 107023065 | AMPL | 0.780347864 |
| patient #164 | 15 | 20161372  | 20577494  | LOSS | -0.28658878 | PDX#164 | 15 | 20161372  | 26746446  | LOSS | -0.1201309  |
|              |    |           |           |      |             | PDX#164 | 15 | 26752373  | 26872259  | HDEL | -1.0675029  |
| patient #164 | 16 | 46820464  | 48132847  | LOSS | -0.14603658 | PDX#164 | 16 | 72911406  | 74171216  | LOSS | -0.24258104 |
|              |    |           |           |      |             | PDX#164 | 16 | 74183855  | 88302760  | GAIN | 0.114546239 |
| patient #164 | 17 | 44163925  | 44799962  | LOSS | -0.49388819 |         |    |           |           |      |             |
| patient #164 | 18 | 47709926  | 52717564  | LOSS | -0.1310454  | PDX#164 | 18 | 28109801  | 48111941  | LOSS | -0.17619072 |
|              |    |           |           |      |             | PDX#164 | 18 | 48114756  | 50039676  | HDEL | -2.47616174 |
|              |    |           |           |      |             | PDX#164 | 18 | 50043368  | 52483586  | LOSS | -0.27688464 |
|              |    |           |           |      |             | PDX#164 | 18 | 65009233  | 69958047  | LOSS | -0.20462023 |

PDXs mucinous ovarian cancer models

|              |       |           |           |      |             | PDX#164 | 19    | 19683350  | 20397555  | LOSS | -0.41962018 |
|--------------|-------|-----------|-----------|------|-------------|---------|-------|-----------|-----------|------|-------------|
|              |       |           |           |      |             | PDX#164 | 21    | 10734842  | 17242234  | LOSS | -0.42742183 |
|              |       |           |           |      |             | PDX#164 | 21    | 20415950  | 25158258  | LOSS | -0.12592933 |
|              |       |           |           |      |             | PDX#164 | 21    | 25165525  | 27414889  | LOSS | -0.51966215 |
|              |       |           |           |      |             | PDX#164 | 22    | 16079545  | 51169045  | LOSS | -0.11285165 |
| patient #164 | 23    | 7335191   | 7517325   | AMPL | 0.917457097 | PDX#164 | 23    | 126729969 | 127403730 | HDEL | -0.69614929 |
| ID           | chrom | loc.start | loc.end   | type | seg.mean    | ID      | chrom | loc.start | loc.end   | type | seg.mean    |
| patient #82  | 6     | 58738122  | 62230131  | LOSS | -0.33187307 |         |       |           |           |      |             |
| patient #82  | 7     | 61905009  | 64284502  | LOSS | -0.23511491 |         |       |           |           |      |             |
| patient #82  | 8     | 144670950 | 144899538 | LOSS | -0.46173432 |         |       |           |           |      |             |
| patient #82  | 9     | 10291546  | 12247973  | LOSS | -0.22640716 |         |       |           |           |      |             |
| patient #82  | 11    | 21712019  | 28237516  | LOSS | -0.12125467 | PDX#182 | 11    | 50345592  | 51366191  | LOSS | -0.37653636 |
| patient #82  | 11    | 48647107  | 50460079  | LOSS | -0.17863142 |         |       |           |           |      |             |
| patient #82  | 11    | 50467850  | 51366191  | HDEL | -0.76198416 |         |       |           |           |      |             |
| patient #82  | 14    | 106681665 | 106997898 | AMPL | 1.48395907  | PDX#182 | 14    | 106391073 | 107023065 | GAIN | 0.566176383 |
| patient #82  | 14    | 107023065 | 107282437 | GAIN | 0.124723335 | PDX#182 | 14    | 107032603 | 107282437 | LOSS | -0.14755029 |
| patient #82  | 19    | 23534190  | 24368053  | LOSS | -0.18175417 |         |       |           |           |      |             |
| patient #82  | 19    | 24368534  | 28379648  | LOSS | -0.46060025 |         |       |           |           |      |             |
| patient #82  | 22    | 18901004  | 19016663  | GAIN | 0.364652091 |         |       |           |           |      |             |
| patient #82  | 23    | 7335191   | 7528738   | AMPL | 1.203133776 |         |       |           |           |      |             |
| patient #82  | 23    | 7537276   | 8115453   | GAIN | 0.11469615  |         |       |           |           |      |             |

PDXs mucinous ovarian cancer models

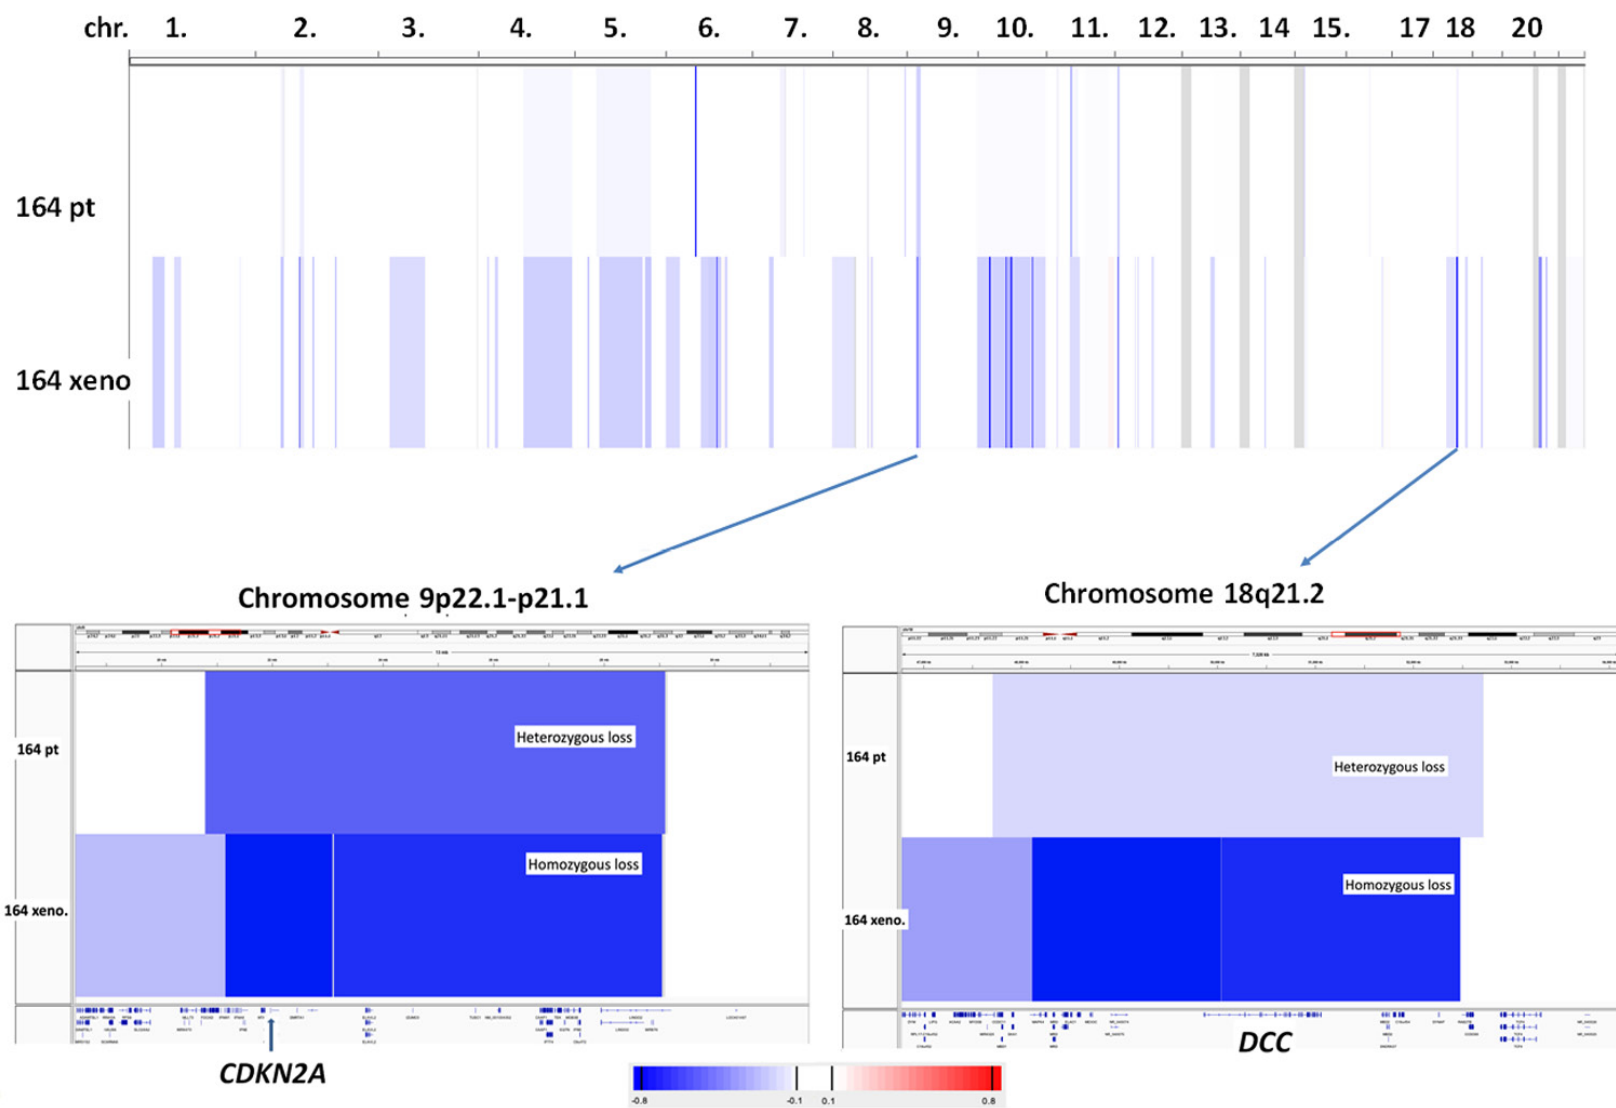

Supplementary Figure 2. Copy number variation analysis in patients #164 and its corresponding PDX. Upper plot represents the heatmap of copy number changes across the genome. Lower plots focuses on CDKN2A and DCC genes loci. In both panels: white, normal copy number; blue, DNA loss; red, DNA gain.

## PDXs mucinous ovarian cancer models

**Supplementary Table 3.** Pawthway enrichment analysis in mucinous PDXs as compared to hiugh grade serous/endometriod PDXs

| Gene Set Name                                       | # Genes in Gene Set (K) | Description                                                                                                                                                                                 | # Genes in Overlap (k) | k/K    | p-value  | FDR q-value |
|-----------------------------------------------------|-------------------------|---------------------------------------------------------------------------------------------------------------------------------------------------------------------------------------------|------------------------|--------|----------|-------------|
| JAEGER_METASTASIS_UP                                | 44                      | Genes up-regulated in metastases from malignant melanoma compared to the primary tumors.                                                                                                    | 3                      | 0.0682 | 3.61E-06 | 4.76E-02    |
| SATO_SILENCED_BY_METHYLATION_IN_PANCREATIC_CANCER_1 | 419                     | Genes up-regulated in the pancreatic cancer cell lines (AsPC1, Hs766T, MiaPaCa2, Panc1) but not in the non-neoplastic cells (HPDE) by decitabine (5-aza-2'-deoxycytidine) [PubChem=451668]. | 5                      | 0.0119 | 8.60E-06 | 4.76E-02    |
| GSE2706_LPS_VS_R848_AND_LPS_8H_STIM_DC_DN           | 200                     | Genes down-regulated in comparison of dendritic cells (DC) stimulated with LPS (TLR4 agonist) at 8 h versus DCs stimulated with LPS (TLR4 agonist) and R848 for 8 h.                        | 4                      | 0.02   | 9.99E-06 | 4.76E-02    |
| Gene Set Name                                       | # Genes in Gene Set (K) | Description                                                                                                                                                                                 | # Genes in Overlap (k) | k/K    | p-value  | FDR q-value |
| HALLMARK_TNFA_SIGNALING_VIA_NFKB                    | 200                     | Genes regulated by NF-kB in response to TNF [GeneID=7124].                                                                                                                                  | 9                      | 0.045  | 7.47E-09 | 3.74E-07    |
| HALLMARK_APICAL_JUNCTION                            | 200                     | Genes encoding components of apical junction complex.                                                                                                                                       | 8                      | 0.04   | 1.30E-07 | 3.25E-06    |
| HALLMARK_IL2_STAT5_SIGNALING                        | 200                     | Genes up-regulated by STAT5 in response to IL2 stimulation.                                                                                                                                 | 7                      | 0.035  | 1.98E-06 | 3.30E-05    |
| HALLMARK_EPITHELIAL_MESENCHYMAL_TRANSITION          | 200                     | Genes defining epithelial-mesenchymal transition, as in wound healing, fibrosis and metastasis.                                                                                             | 6                      | 0.03   | 2.62E-05 | 3.27E-04    |
| HALLMARK_APOPTOSIS                                  | 161                     | Genes mediating programmed cell death (apoptosis) by activation of caspases.                                                                                                                | 5                      | 0.0311 | 1.07E-04 | 1.07E-03    |
| HALLMARK_ESTROGEN_RESPONSE_LATE                     | 200                     | Genes defining late response to estrogen.                                                                                                                                                   | 5                      | 0.025  | 2.94E-04 | 1.83E-03    |
| HALLMARK_MITOTIC_SPINDLE                            | 200                     | Genes important for mitotic spindle assembly.                                                                                                                                               | 5                      | 0.025  | 2.94E-04 | 1.83E-03    |
| HALLMARK_XENOBIOTIC_METABOLISM                      | 200                     | Genes encoding proteins involved in processing of drugs and other xenobiotics.                                                                                                              | 5                      | 0.025  | 2.94E-04 | 1.83E-03    |
| HALLMARK_UV_RESPONSE_DN                             | 144                     | Genes down-regulated in response to ultraviolet (UV) radiation.                                                                                                                             | 4                      | 0.0278 | 8.19E-04 | 4.55E-03    |
| HALLMARK_UV_RESPONSE_UP                             | 158                     | Genes up-regulated in response to ultraviolet (UV) radiation.                                                                                                                               | 4                      | 0.0253 | 1.15E-03 | 5.77E-03    |
| HALLMARK_IL6_JAK_STAT3_SIGNALING                    | 87                      | Genes up-regulated by IL6 [GeneID=3569] via STAT3 [GeneID=6774], e.g., during acute phase response.                                                                                         | 3                      | 0.0345 | 2.06E-03 | 9.36E-03    |
| HALLMARK_ESTROGEN_RESPONSE_EARLY                    | 200                     | Genes defining early response to estrogen.                                                                                                                                                  | 4                      | 0.02   | 2.73E-03 | 9.73E-03    |
| HALLMARK_INFLAMMATORY_RESPONSE                      | 200                     | Genes defining inflammatory response.                                                                                                                                                       | 4                      | 0.02   | 2.73E-03 | 9.73E-03    |
| HALLMARK_KRAS_SIGNALING_UP                          | 200                     | Genes up-regulated by KRAS activation.                                                                                                                                                      | 4                      | 0.02   | 2.73E-03 | 9.73E-03    |
| HALLMARK_WNT_BETA_CATENIN_SIGNALING                 | 42                      | Genes up-regulated by activation of WNT signaling through accumulation of beta catenin CTNNB1.                                                                                              | 2                      | 0.0476 | 6.54E-03 | 2.18E-02    |

PDXs mucinous ovarian cancer models

**Supplementary Table 4.** Metabolomic analysis (untargeted and targeted) on high-grade serous/endometrioid (#124, #239) and mucinous ovarian carcinoma (#182, #164)

| Metabolites              | Fold Change | Peak intensity    |          |          |          |          |          |          |          |          |          | Adduct | Mw_mean  |
|--------------------------|-------------|-------------------|----------|----------|----------|----------|----------|----------|----------|----------|----------|--------|----------|
|                          |             | High grade serous |          |          |          |          |          | Mucinous |          |          |          |        |          |
|                          |             | #124              |          | #239     |          | #182     |          | #164     |          |          |          |        |          |
| Creatine                 | 1.09        | 228833.2          | 305577.9 | 320288.7 | 432260.1 | 389198.2 | 406463.6 | 473933.4 | 407565   | 460742.7 | 174265.3 | M+H    | 132.0769 |
| Spermine                 | -1.14       | 96460.75          | 146801.7 | 157175.1 | 337359.9 | 242466.4 | 279307.7 | 137152.4 | 250907.4 | 247377   | 103961.5 | M+H    | 203.2232 |
| Acetylcarnitine          | -1.16       | 366178.3          | 381830.2 | 468221.6 | 739855.9 | 703406.4 | 741415.5 | 665684.9 | 326560.6 | 292845.6 | 668086.6 | M+H    | 204.1242 |
| N1-Acetylspermine        | 17.63       | 0                 | 0        | 0        | 2535.41  | 3609.909 | 2483.7   | 6745.919 | 58172.18 | 32011.23 | 4509.496 | M+H    | 245.2334 |
| Hexanoylcarnitine        | -5.31       | 265414.4          | 324020.5 | 345591.5 | 9672.969 | 7472.402 | 13976.67 | 40215.29 | 12546.24 | 12971.31 | 55460.85 | M+H    | 260.1859 |
| Octanoylcarnitine        | -4.02       | 70392.93          | 85899.29 | 88564.12 | 3057.612 | 2721.775 | 5525.541 | 13938.99 | 5289.471 | 4558.743 | 18646.87 | M+H    | 288.2169 |
| Decanoylcarnitine        | -2.40       | 44855.78          | 53548.33 | 59501.01 | 4322.136 | 4347.306 | 7166.844 | 11620.86 | 11302.45 | 10650.26 | 14628.94 | M+H    | 316.2481 |
| Stearoylcarnitine        | 1.03        | 104048.1          | 120308.5 | 201365.9 | 28442.79 | 24712.26 | 47338.2  | 51165.41 | 121550.9 | 173809.9 | 13164.46 | M+H    | 428.3728 |
| pyruvate                 | -1.89       | 43953.1           | 47688.57 | 46379.98 | 27194.73 | 28971.02 | 21595.23 | 26191.38 | 12454.61 | 10085.34 | 27353.59 | M-H    | 87.00887 |
| lactic acid              | 1.34        | 72003.43          | 60500.05 | 60391.76 | 107347.1 | 90665.49 | 86154.4  | 123149.3 | 100769.9 | 105540.9 | 95471.23 | M-H    | 89.02453 |
| Oxalacetic acid          | 1.01        | 85551.33          | 90015.6  | 83150.14 | 90978.8  | 90982.21 | 88475.51 | 89708.87 | 85394.51 | 87838.23 | 92181.96 | M-H    | 112.9856 |
| fumarate                 | -1.61       | 36537.71          | 39288.87 | 38162.33 | 26739.47 | 31083.41 | 22524.44 | 25259.82 | 15673.96 | 14512.53 | 25142.9  | M-H    | 115.0036 |
| succinate                | 2.89        | 7132.301          | 8456.018 | 7403.189 | 14638.82 | 9608.096 | 8801.011 | 21042.56 | 33688.93 | 35584.64 | 17810.19 | M-H    | 117.0192 |
| Taurine                  | -1.10       | 177192            | 181394   | 161201   | 270453.4 | 215748.9 | 249176.1 | 223930.2 | 191422.2 | 160597.8 | 185014.9 | M-H    | 124.0073 |
| Pyroglutamic acid        | 2.33        | 7714.318          | 8293.904 | 7240.291 | 5707.378 | 6178.577 | 5632.256 | 16589.44 | 15084.66 | 10292.03 | 21377    | M-H    | 128.0352 |
| malate                   | 1.04        | 52873.76          | 54826.86 | 58612.18 | 75048.6  | 99263.5  | 71718.49 | 71847.6  | 73192.88 | 76268.8  | 64056.33 | M-H    | 133.0141 |
| Hypoxanthine             | 2.11        | 9752.633          | 8634.266 | 9584.405 | 7834.029 | 6384.18  | 7489.89  | 9065.039 | 26797.52 | 21050.41 | 12823.1  | M-H    | 135.0303 |
| Glutamine                | 1.54        | 15068.73          | 11684.82 | 5935.058 | 10868.63 | 12511.1  | 12059.12 | 24047.5  | 6931.186 | 26322.21 | 12532.41 | M-H    | 145.0617 |
| Xanthine                 | 5.45        | 4107.661          | 2760.118 | 4793.89  | 5393.98  | 2120.585 | 3778.583 | 5793.8   | 38559.95 | 27783.52 | 11299.31 | M-H    | 151.0259 |
| Uric acid                | 4.58        | 1880.298          | 991.4921 | 1724.652 | 2868.161 | 1359.515 | 1443.211 | 10060.69 | 5663.07  | 5063.052 | 10543.61 | M-H    | 167.0209 |
| N-Acetyl-L-aspartic acid | -8.01       | 26361.08          | 25842.79 | 26555.23 | 87379.41 | 180810.1 | 127591.2 | 18244.34 | 2374.491 | 1857.783 | 17033.33 | M-H    | 174.0407 |
| Citric acid              | -1.92       | 23440.87          | 23287.9  | 27555.34 | 28437.22 | 48794.96 | 43898.11 | 25582.46 | 12331.08 | 12129.58 | 17880.49 | M-H    | 191.0195 |
| Pantothenic acid         | -1.44       | 182209.1          | 163429.7 | 149892   | 82019.9  | 62769.01 | 61679.26 | 108630.2 | 37952.23 | 48938.42 | 129097.6 | M-H    | 218.1031 |
| Palmitic acid            | -1.14       | 424097.1          | 263380.1 | 236264.9 | 130630   | 217812.3 | 177980   | 259444.7 | 182471.7 | 218265.3 | 187504.3 | M-H    | 255.2329 |
| Linoleic acid            | 2.65        | 14271.92          | 9028.383 | 12708.97 | 4896.332 | 7453.251 | 5095.058 | 15929.72 | 27061.11 | 27342.97 | 24104.9  | M-H    | 279.2324 |
| Oleic acid               | 1.41        | 35591.02          | 11022.09 | 17483.79 | 5406.544 | 11896.4  | 9392.697 | 14371.9  | 28910.29 | 29055.8  | 12784.84 | M-H    | 281.248  |
| Stearic acid             | -1.27       | 454076.9          | 298429.4 | 277048.6 | 152648.2 | 274069.5 | 223892.4 | 312610.4 | 157925.3 | 257256.1 | 154177.8 | M-H    | 283.2642 |
| Arachidonic acid         | 4.58        | 16950.42          | 10499.97 | 15985.38 | 12365.39 | 16992.79 | 10647.9  | 33696.31 | 69307.82 | 47879.95 | 103768.4 | M-H    | 303.2323 |
| Glutathione              | -1.02       | 35733.33          | 50362.12 | 48598.28 | 49568.08 | 51453.06 | 50315.18 | 30078.42 | 35096.96 | 95817.24 | 25226.16 | M-H    | 306.0757 |
|                          |             | µM                |          |          |          |          |          |          |          |          |          |        |          |
| Sample Identification    |             | High grade serous |          |          |          |          |          | Mucinous |          |          |          |        |          |
|                          |             | #124              |          | #239     |          | #182     |          | #164     |          |          |          |        |          |
|                          |             |                   |          |          |          |          |          |          |          |          |          |        |          |
| lysoPC a C16:0           | 3.50        | 36.7              | 67.2     | 46.6     | 4.546667 | 3.546667 | 3.116667 | 3.796667 | 2.456667 | 105.55   | 159.35   |        |          |
| lysoPC a C16:1           | 51.54       | 0.860667          | 1.249    | 0.806667 | 0.090667 | 0.104667 | 0.091    | 0.085    | 0.076667 | 27.65    | 39.45    |        |          |
| lysoPC a C17:0           | 18.64       | 1.53              | 3.406667 | 1.768667 | 0.125    | 0.101333 | 0.093667 | 0.086    | 0.066333 | 30.3     | 38.35    |        |          |

## PDXs mucinous ovarian cancer models

|                |       |          |          |          |          |          |          |          |          |         |         |
|----------------|-------|----------|----------|----------|----------|----------|----------|----------|----------|---------|---------|
| lysoPC a C18:1 | 14.01 | 2.62     | 2.01     | 1.626667 | 0.711    | 0.58     | 0.624    | 0.541333 | 0.379    | 22.9    | 24.25   |
| lysoPC a C18:2 | 10.12 | 2.68     | 2.263333 | 1.52     | 0.824    | 0.469    | 0.438667 | 1.288333 | 0.906333 | 23.65   | 22.75   |
| PC aa C30:0    | 5.09  | 6.823333 | 5.343333 | 6.013333 | 0.392333 | 0.611    | 0.485    | 0.234667 | 0.109667 | 27.05   | 33.3    |
| PC aa C30:2    | 6.75  | 0.782    | 0.953667 | 0.819    | 0.015333 | 0.022    | 0.018333 | 0.007333 | 0.004667 | 3.665   | 5.2     |
| PC aa C32:0    | 2.70  | 61.8     | 44.13333 | 58.6     | 4.043333 | 4.683333 | 3.333333 | 2.666667 | 1.293    | 104     | 48.05   |
| PC aa C32:1    | 2.77  | 56.73333 | 33.86667 | 34.2     | 3.156667 | 6.993333 | 4.613333 | 4.876667 | 1.305    | 90.2    | 62      |
| PC aa C32:3    | 13.47 | 11.24333 | 10.61333 | 12.49    | 0.139    | 0.204667 | 0.149333 | 0.141333 | 0.034333 | 137.5   | 72.5    |
| PC aa C34:3    | 7.58  | 18.7     | 14.33333 | 13.38    | 1.35     | 2.623333 | 1.610333 | 2.49     | 0.674333 | 55.55   | 64.7    |
| PC aa C34:4    | 6.51  | 20.6     | 17.6     | 18.83333 | 0.310667 | 0.542667 | 0.4      | 0.411    | 0.115667 | 108     | 132.5   |
| PC aa C36:1    | 6.60  | 19.23333 | 13.53333 | 14.26667 | 1.297667 | 1.786667 | 1.408667 | 0.361    | 0.271333 | 67.8    | 77.65   |
| PC aa C36:3    | 2.08  | 40.66667 | 26.56667 | 21.96667 | 3.31     | 7.326667 | 3.846667 | 4.72     | 1.574667 | 47.55   | 64.1    |
| PC aa C36:5    | 4.64  | 22.03333 | 16.63333 | 14.93333 | 0.584333 | 1.141    | 0.726667 | 1.122333 | 0.263667 | 83.95   | 35      |
| PC aa C36:6    | 8.21  | 12.33    | 11.28667 | 13.91667 | 0.078667 | 0.118    | 0.097667 | 0.092    | 0.024333 | 106.9   | 58.9    |
| PC aa C38:3    | 10.29 | 8.176667 | 6.323333 | 6.873333 | 0.386667 | 0.671333 | 0.380667 | 0.268    | 0.123333 | 77.9    | 43.45   |
| PC aa C38:4    | 1.54  | 54.26667 | 35.8     | 28.56667 | 2.252    | 4.08     | 2.025    | 2.174    | 0.839333 | 42.25   | 56.05   |
| PC aa C38:5    | 3.58  | 39.5     | 25.5     | 23.36667 | 1.277667 | 2.64     | 1.4      | 1.879333 | 0.450667 | 120     | 44.5    |
| PC aa C40:4    | 10.71 | 6.563333 | 5.223333 | 5.25     | 0.109667 | 0.118333 | 0.085333 | 0.064667 | 0.025    | 9.1     | 64.15   |
| PC aa C40:5    | 12.57 | 7.333333 | 5.676667 | 5.96     | 0.106667 | 0.170667 | 0.101    | 0.096    | 0.025667 | 70.8    | 35.85   |
| PC ae C30:1    | 22.55 | 0.770333 | 0.707333 | 0.854667 | 0.039333 | 0.057333 | 0.041333 | 0.037667 | 0.016667 | 5.35    | 18.56   |
| PC ae C30:2    | 23.05 | 0.949333 | 1.071333 | 1.044    | 0.012667 | 0.014667 | 0.012    | 0.01     | 0.004667 | 16      | 28.45   |
| PC ae C32:1    | 16.14 | 10.33667 | 8.636667 | 10.61    | 0.375667 | 0.688333 | 0.495333 | 0.289    | 0.121333 | 149.8   | 65.7    |
| PC ae C34:1    | 6.37  | 15.96667 | 12.04667 | 12.73333 | 0.621667 | 1.09     | 0.670667 | 0.546667 | 0.202    | 66.25   | 78.5    |
| PC ae C34:2    | 5.14  | 11.33333 | 9.24     | 9.086667 | 0.444333 | 1.097667 | 0.575667 | 0.792667 | 0.338333 | 75.85   | 15.45   |
| PC ae C34:3    | 15.85 | 10.34    | 9.026667 | 11.58333 | 0.186333 | 0.468667 | 0.261667 | 0.385667 | 0.278    | 107.8   | 112.5   |
| PC ae C36:2    | 12.09 | 9.06     | 7.586667 | 8.26     | 0.348667 | 0.655667 | 0.373333 | 0.442    | 0.286333 | 137     | 41.95   |
| PC ae C36:3    | 9.38  | 9.313333 | 7.886667 | 8.68     | 0.179667 | 0.394    | 0.278    | 0.335667 | 0.144667 | 36.5    | 29.4    |
| PC ae C36:4    | 5.67  | 23.46667 | 16.36667 | 16.5     | 0.437    | 0.738667 | 0.392667 | 0.648667 | 0.217667 | 99.35   | 41.75   |
| PC ae C36:5    | 6.19  | 17.8     | 15.03333 | 15.96667 | 0.528333 | 1.727333 | 1.036333 | 0.473667 | 0.278    | 81.25   | 67.5    |
| PC ae C38:2    | 12.17 | 5.243333 | 4.106667 | 5.403333 | 0.044667 | 0.071667 | 0.041667 | 0.047    | 0.031333 | 6.75    | 19.4    |
| PC ae C38:3    | 10.97 | 7.266667 | 6.036667 | 7.18     | 0.092333 | 0.149667 | 0.085667 | 0.074    | 0.032    | 113.5   | 48.15   |
| PC ae C38:5    | 8.24  | 13.1     | 9.163333 | 9.283333 | 0.427    | 0.848667 | 0.55     | 0.52     | 0.140667 | 36.85   | 50.25   |
| PC ae C38:6    | 7.22  | 11.93333 | 9.663333 | 10.23333 | 0.155333 | 0.428    | 0.261    | 0.251667 | 0.068    | 87.5    | 30.75   |
| PC ae C40:1    | 7.11  | 7.006667 | 5.543333 | 5.226667 | 0.245    | 0.499667 | 0.297    | 0.437    | 0.146    | 47.45   | 23.95   |
| PC ae C40:5    | 8.90  | 5.763333 | 5.36     | 5.84     | 0.062333 | 0.084667 | 0.053667 | 0.051333 | 0.022667 | 57.45   | 37.5    |
| PC ae C42:2    | 11.18 | 4.29     | 3.503333 | 3.763333 | 0.034333 | 0.069667 | 0.05     | 0.030333 | 0.014    | 16.55   | 32.43   |
| PC ae C42:3    | 15.72 | 4.923333 | 4.21     | 4.406667 | 0.088333 | 0.143333 | 0.089667 | 0.091    | 0.041333 | 90.15   | 27.8    |
| PC ae C42:4    | 12.99 | 3.503333 | 3.223333 | 3.163333 | 0.005    | 0.007    | 0.003    | 0.003667 | 0.005    | 24.6    | 43.55   |
| sugars         | 51.35 | 588.3333 | 498      | 270.3333 | 102.4333 | 122.8667 | 37.5     | 116.1    | 27.4     | 18503.5 | 23667.5 |
| Kynurenine     | 2.86  | 0.421333 | 0.410667 | 0.518333 | 0.573667 | 0.251667 | 0.184667 | 2.026667 | 2.353333 | 0.4725  | 0.3715  |
| Met-SO         | -2.96 | 4.933333 | 3.23     | 1.81     | 1.209    | 0.802    | 0.585667 | 0.314667 | 0.281667 | 0.4825  | 1.265   |
| Spermine       | -3.80 | 2.264667 | 4.296667 | 35.3     | 3.203333 | 2.492333 | 2.59     | 1.09     | 1.15     | 2       | 4.195   |



## PDXs mucinous ovarian cancer models

|               |        |          |          |          |          |          |          |          |          |        |       |
|---------------|--------|----------|----------|----------|----------|----------|----------|----------|----------|--------|-------|
| t4-OH-Pro     | 2.24   | 7.41     | 6.963333 | 6.523333 | 3.293333 | 3.91     | 3.683333 | 4.7      | 4.743333 | 14.65  | 21.45 |
| Taurine       | 1.04   | 813.3333 | 922      | 876.3333 | 190      | 196      | 201      | 204.6667 | 210.6667 | 704.5  | 831   |
| Cit           | 3.96   | 12.66667 | 11.8     | 9.963333 | 2.44     | 1.53     | 1.553333 | 7.076667 | 3.773333 | 26.05  | 64.25 |
| Gly           | 1.30   | 486.6667 | 445.6667 | 382.6667 | 396      | 443      | 427.6667 | 271.3333 | 348.6667 | 611    | 960   |
| His           | 1.14   | 46.93333 | 40.73333 | 39.8     | 22.63333 | 18.57667 | 17.3     | 16.6     | 15.16667 | 29.7   | 66.45 |
| Met           | -1.34  | 54.66667 | 48.2     | 41.63333 | 16.43333 | 11.74333 | 10.6     | 8.556667 | 9.19     | 25.15  | 41.8  |
| Pro           | 1.05   | 157.3333 | 126.6667 | 122.7667 | 130.3333 | 104.1    | 126      | 54.76667 | 56       | 145    | 256   |
| SM (OH) C14:1 | 98.23  | 0.562667 | 0.613667 | 0.558333 | 0.067333 | 0.105333 | 0.055667 | 0.048    | 0.039    | 50.5   | 32.05 |
| SM (OH) C16:1 | 63.88  | 0.62     | 0.603    | 0.534    | 0.076    | 0.121333 | 0.078333 | 0.026333 | 0.022333 | 45.3   | 21.8  |
| SM (OH) C24:1 | 31.55  | 0.261667 | 0.295    | 0.233333 | 0.005333 | 0.006333 | 0.006333 | 0.005667 | 0.001333 | 0.6565 | 11.96 |
| SM C16:0      | 6.68   | 6.753333 | 6.693333 | 4.963333 | 2.443333 | 3.916667 | 2.833333 | 1.886667 | 1.171667 | 78.55  | 39.3  |
| SM C16:1      | 30.35  | 2.073333 | 1.716667 | 1.385    | 0.192    | 0.333667 | 0.207333 | 0.341    | 0.221    | 31.55  | 44.4  |
| SM C18:0      | 26.28  | 1.108333 | 1.186667 | 0.877667 | 0.389667 | 0.561    | 0.450667 | 0.159667 | 0.084333 | 29.95  | 46.1  |
| SM C18:1      | 21.61  | 1.03     | 0.702333 | 0.547667 | 0.077667 | 0.165333 | 0.104    | 0.062    | 0.041    | 5.11   | 15.05 |
| C16           | 2.17   | 2.803333 | 2.766667 | 4.493333 | 0.219    | 0.177667 | 0.231    | 0.695333 | 0.302    | 6.03   | 6.145 |
| C18           | 6.50   | 0.842667 | 0.650667 | 1.627667 | 0.118667 | 0.158    | 0.182667 | 0.195667 | 0.072333 | 6.53   | 7.64  |
| C18:1         | 22.52  | 0.418667 | 0.428333 | 0.758333 | 0.098667 | 0.071667 | 0.115667 | 0.460333 | 0.176    | 12.5   | 13.25 |
| C18:2         | 9.95   | 0.361    | 0.516667 | 0.608333 | 0.057333 | 0.042    | 0.059    | 0.312    | 0.207    | 4.375  | 4.88  |
| C2            | -1.94  | 11.89    | 12.5     | 15.9     | 16.66667 | 14.22    | 15.33333 | 11.73333 | 12.9     | 4.32   | 4.07  |
| C3            | 2.85   | 0.744667 | 0.662    | 0.691    | 0.486333 | 0.525667 | 0.453    | 0.274667 | 0.558667 | 2.66   | 2.405 |
| C3-DC (C4-OH) | 3.28   | 0.339333 | 0.334    | 0.356333 | 0.212667 | 0.179333 | 0.160667 | 0.180667 | 0.204    | 1.37   | 1.24  |
| C4            | -11.68 | 29.1     | 23.23333 | 23.03333 | 1.154    | 0.848    | 1.066667 | 0.676333 | 0.653333 | 1.52   | 1.405 |
